# Supplementary material
Source: Research Square preprint supplement (doi:10.21203/rs.3.rs-8971643/v1)
Supplement: Supplementary file 1 [file 8d2ed0986e6899f0c726d75b.docx]

Supplementary

*Antidiabetic and antioxidant potential of Oenocarpus bataua Mart: a metabolomic and in silico study*

Noroska G. S. Mogollón1,+, Karel Diéguez-Santana1,+, Carlos Alberto Méndez-Durazno2, Thomas Garzón1, Jefferson Pastuña-Fasso1, Roberth Reyes1, Katterine Olalla-Tacuri1, José R. Almeida1, Melanie Ochoa-Ocampo1, Pablo Cisneros-Pérez3, Patricio J. Espinoza-Montero2*

1 Biomolecules Discovery Group, Universidad Regional Amazónica Ikiam, Tena 150102, Ecuador.

2 Facultad de Ciencias Exactas, Naturales y Ambientales, Pontificia Universidad Católica del Ecuador, Quito 170525, Ecuador.

3 Yachay Tech University, School of Chemical Sciences and Engineering, Urcuqui 100650, Ecuador.

* E-mail address: [pespinoza646@puce.edu.ec](mailto:pespinoza646@puce.edu.ec) (Patricio J. Espinoza-Montero)

+ These authors contributed equally

**Supplementary Table 1** | Comprehensive molecular docking results of all screened metabolites against human pancreatic α-amylase (PDB ID: 4GQR) and α-glucosidase (PDB ID: 3A4A). Predicted binding affinities (ΔG, kcal/mol), key interacting residues within the catalytic pocket, and principal interaction types—including hydrogen bonds, π–π stacking, π–cation interactions, and hydrophobic contacts—are summarized. Redocking validation data for the reference ligands acarbose and myricetin are additionally presented to evaluate docking protocol robustness and the reproducibility of active-site binding conformations.

| Ligand | Affinity (kcal/mol) α-Amylase | Affinity (kcal/mol) α-Glucosidase | Mean Two Enzymes |
| --- | --- | --- | --- |
| Procyanidin B2 | -9.0 | -11.2 | -10.1 |
| Isoschaftoside | -8.3 | -11.5 | -9.9 |
| Corymboside | -9.4 | -10.3 | -9.85 |
| Procyanidin B1 | -9.2 | -10.1 | -9.65 |
| Procyanidin B3 | -9.1 | -9.7 | -9.4 |
| Pheophorbide A | -9.8 | -8.4 | -9.1 |
| Procyanidin C1 | -9.3 | -8.9 | -9.1 |
| 3-Genistein-8-C-glucoside | -8.6 | -9.5 | -9.05 |
| Isorhamnetin-3-glucoside | -8.5 | -9.5 | -9 |
| Kaempferol-3-O-robinobioside | -8.4 | -9.5 | -8.95 |
| Licoflavone C | -8.6 | -9.2 | -8.9 |
| 3,7,3',4',5'-Pentahydroxyflavone | -8.5 | -8.3 | -8.4 |
| Epicatechin | -8.4 | -8.4 | -8.4 |
| Quercetin 3'-methyl ether | -8.3 | -8.3 | -8.3 |
| Apigenin | -8.3 | -8.2 | -8.25 |
| Catechin | -8.5 | -8.0 | -8.25 |
| Naringenin | -8.0 | -8.4 | -8.2 |
| Tricin | -7.6 | -8.3 | -7.95 |
| Chlorogenic Acid | -7.4 | -8.5 | -7.95 |
| 3'-Hydroxy-5,6,7,4'-tetramethoxyflavone | -7.1 | -8.5 | -7.8 |
| Guanosine | -7.5 | -8.0 | -7.75 |
| Piceatannol | -7.4 | -8.0 | -7.7 |
| E-Piceatannol | -7.4 | -8.0 | -7.7 |
| Transresveratrol | -7.7 | -7.2 | -7.45 |
| D-Tryptophan | -6.6 | -7.7 | -7.15 |
| 9S-Hydroxy-10E,12Z,15Z-octadecatrienoic acid | -6.4 | -6.8 | -6.6 |
| FA 18:1+3O | -6.0 | -7.0 | -6.5 |
| Phenylalanine | -5.9 | -6.7 | -6.3 |
| Tyrosine | -6.0 | -6.6 | -6.3 |
| 13-Keto-9Z,11E-octadecadienoic acid | -5.8 | -6.8 | -6.3 |
| Citric acid | -5.9 | -6.6 | -6.25 |
| PE(16:0/0:0) | -6.0 | -6.3 | -6.15 |
| Ascorbic acid | -6.0 | -5.8 | -5.9 |
| Shikimic acid | -5.8 | -5.9 | -5.85 |
| Monoolein | -5.2 | -6.4 | -5.8 |
| Salicylic acid | -5.5 | -5.9 | -5.7 |
| Geraniol | -5.5 | -5.9 | -5.7 |
| 1H-Indole-4-carboxaldehyde | -5.8 | -5.5 | -5.65 |
| Niacin | -4.9 | -5.3 | -5.1 |
| Trigonelline | -4.6 | -5.5 | -5.05 |
| Betaine | -3.6 | -4.0 | -3.8 |
| Myricetin (Redock) | -7.9 | -8.4 | -8.15 |
| Acarbose (Redock) | -7.2 | -9.1 | -8.15 |
