# Supplementary material
Source: Research Square preprint supplement (doi:10.21203/rs.3.rs-8971643/v1)
Supplement: Supplementary file 2 [file c7c287c88e07e323e258a111.xlsx]

## Sheet: Suplemental table key
Antidiabetic and antioxidant potential of Oenocarpus bataua Mart: a metabolomic and in silico study Noroska G. S. Mogollón1,+, Karel Diéguez-Santana1,+, Carlos Alberto Méndez-Durazno2, Thomas Garzón1, Jefferson Pastuña-Fasso1, Roberth Reyes1, Katterine Olalla-Tacuri1, José R. Almeida1, Melanie Ochoa-Ocampo1, Pablo Cisneros-Pérez3, Patricio J. Espinoza-Montero2*
Table S1 Parameters set for Full scan liquid chromatography-mass spectometry (LC-MS/MS) positive ionization mode data deconcolution in MZmine 4.5.20
Table S2 Parameters set for Full scan liquid chromatography-mass spectometry (LC-MS/MS) negative ionization mode data deconcolution in MZmine 4.5.20
Table S3.1 Parameters set for DDA liquid chromatography-mass spectrometry (LC-MS/MS) positive ionization mode 10 eV of collision energy data deconvolution in MZmine 4.5.20
Table S3.2 Parameters set for DDA liquid chromatography-mass spectrometry (LC-MS/MS) negative ionization mode 10 eV of collision energy data deconvolution in MZmine 4.5.20
Table S4.1 Parameters set for DDA liquid chromatography-mass spectrometry (LC-MS/MS) positive ionization mode 20 eV of collision energy data deconvolution in MZmine 4.5.20
Table S4.2 Parameters set for DDA liquid chromatography-mass spectrometry (LC-MS/MS) negative ionization mode 20 eV of collision energy data deconvolution in MZmine 4.5.20
Table S5 Identification by means of GNPS.

## Sheet: Table S1. Full scan pos
Mzmine 4.5.20
	Import MS data
	Mass detection
		Raw data files:	All raw data files
		Scan filters:	MS1, level = 1
		Mass Detector	Centroid
			Noise level:	600
	Chromatogram builder
		Raw data files:	All raw data files
		Scan filters:	MS1, level = 1
		Minimum consecutive scans:	3
		Minimum intensity for consecutive scans:	1800
		Minimum absolute height:	4200
		m/z tolerance (scan-to-scan):	0.0 m/z or 25.0 ppm
		Suffix:	chromatograms
	Local minimum feature resolver
		Feature lists:	BATCH_LAST_FEATURELISTS
		Suffix:	resolved_1
		Original feature list:	KEEP
		MS/MS scan pairing:	true
			Retention time filter	Use tolerance	0.04 absolute (min)
			MS1 to MS2 precursor tolerance (m/z):	0.2 m/z or 0.0 ppm
		Dimension:	Retention time
		Chromatographic threshold:	0.85
		Minimum search range RT/Mobility (absolute):	0.05
		Minimum relative height:	0
		Minimum absolute height:	1800
		Min ratio of peak top/edge:	1.5
		Peak duration range (min/mobility):	[0.0..1.0]
		Minimum scans (data points):	3
	isotope grouper
		Feature lists:	BATCH_LAST_FEATURELISTS
		Name suffix:	deisotoped
		m/z tolerance (intra-sample):	0.0 m/z or 3 ppm
		Retention time tolerance:	0.02 minutes
		Mobility tolerance:	false
		Monotonic shape:	True
		Maximum charge:	1
		Representative isotope:	Most intense
		Never remove feature with MS2:	true
		Original feature list:	KEEP
	Isotope pattern finder
		Feature lists	BATCH_LAST_FEATURELISTS
		Chemical elements	H,C,N,O,S
		m/z tolerance (feature-to-scan)	0.000 m/z or 5.0 ppm
		Maximum charge of isotope m/z	1
		Search in scans	SINGLE MOST INTENSE
	Join aligner
		Feature lists:	BATCH_LAST_FEATURELISTS
		Feature list name:	Aligned feature list_1
		m/z tolerance (sample-to-sample):	0.0 m/z or 5.0 ppm
		Weight for m/z:	3
		Retention time tolerance:	0.05 minutes
		Weight for RT:	1
		Mobility tolerance:	false	(null)
		Mobility weight:	0
		Require same charge state:	false
		Require same ID:	false
		Compare isotope pattern:	false
		Compare spectra similarity:	True
			Spectral m/z tolerance:	0.001 m/z or 10.0 ppm
			MS level:	2
			Compare spectra similarity:	Weighted cosine similarity
			Weights:	MassBank (mz^2 * I^0.5)
			Minimum cos similarity:	0.85
			Handle unmatched signals:	KEEP ALL AND MATCH TO ZERO
		Original feature list:	KEEP
	Feature list rows filter
		Feature lists	BATCH_LAST_FEATURELISTS
		Name suffix	filtered
		Minimum aligned features (samples)	TRUE
			abs=15
		Minimum features in an isotope pattern	FALSE
		Validate 13C isotope pattern	FALSE
		Remove redundant isotope rows	FALSE
		m/z	FALSE
		Retention time	TRUE
			min=0.24; max=9.59
		features duration range	FALSE
		Chromatographic FWHM	FALSE
		Charge	FALSE
		Kendrick mass defect	FALSE
		Parameter	No parameters defined
		Text in identity	FALSE
		Text in comment	FALSE
		Keep or remove rows	Keep rows that match all criteria
		Feature with MS2 scan	FALSE
		Never remove feature with MS2	FALSE
		Reset the feature number ID	FALSE
		Mass defect	FALSE
		Original feature list	KEEP
	Gap Filling - Peak finder (multithreaded)
		Feature lists	BATCH_LAST_FEATURELISTS
		Name suffix	gap-filled
		Intensity tolerance	0.5
		m/z tolerance	0.000 or 10.0 ppm
		Retention time tolerance	0.03 absolute (min)
		Minimum scans (data points)	1
		Original feature list	KEEP
	Duplicate peak filter
		Filter mode	New average
		m/z tolerance	0.000 or 5.0 ppm
		Retention time tolerance	0.05 absolute (min)
		Mobility tolerance	FALSE
		Require same identification	TRUE
		Original feature list	KEEP

## Sheet: Table S2. Full scan neg
Mzmine 4.5.20
	Import MS data
	Mass detection
		Raw data files:	All raw data files
		Scan filters:	MS1, level = 1
		Mass Detector	Centroid
			Noise level:	600
	Chromatogram builder
		Raw data files:	All raw data files
		Scan filters:	MS1, level = 1
		Minimum consecutive scans:	3
		Minimum intensity for consecutive scans:	1800
		Minimum absolute height:	4200
		m/z tolerance (scan-to-scan):	0.0 m/z or 25.0 ppm
		Suffix:	chromatograms
	Local minimum feature resolver
		Feature lists:	BATCH_LAST_FEATURELISTS
		Suffix:	resolved_1
		Original feature list:	KEEP
		MS/MS scan pairing:	true
			Retention time filter	Use tolerance	0.04 absolute (min)
			MS1 to MS2 precursor tolerance (m/z):	0.2 m/z or 0.0 ppm
		Dimension:	Retention time
		Chromatographic threshold:	0.85
		Minimum search range RT/Mobility (absolute):	0.05
		Minimum relative height:	0
		Minimum absolute height:	1800
		Min ratio of peak top/edge:	1.5
		Peak duration range (min/mobility):	[0.0..1.0]
		Minimum scans (data points):	3
	isotope grouper
		Feature lists:	BATCH_LAST_FEATURELISTS
		Name suffix:	deisotoped
		m/z tolerance (intra-sample):	0.0 m/z or 3 ppm
		Retention time tolerance:	0.02 minutes
		Mobility tolerance:	false
		Monotonic shape:	True
		Maximum charge:	1
		Representative isotope:	Most intense
		Never remove feature with MS2:	true
		Original feature list:	KEEP
	Isotope pattern finder
		Feature lists	BATCH_LAST_FEATURELISTS
		Chemical elements	H,C,N,O,S
		m/z tolerance (feature-to-scan)	0.000 m/z or 5.0 ppm
		Maximum charge of isotope m/z	1
		Search in scans	SINGLE MOST INTENSE
	Join aligner
		Feature lists:	BATCH_LAST_FEATURELISTS
		Feature list name:	Aligned feature list_1
		m/z tolerance (sample-to-sample):	0.0 m/z or 5.0 ppm
		Weight for m/z:	3
		Retention time tolerance:	0.05 minutes
		Weight for RT:	1
		Mobility tolerance:	false	(null)
		Mobility weight:	0
		Require same charge state:	false
		Require same ID:	false
		Compare isotope pattern:	false
		Compare spectra similarity:	True
			Spectral m/z tolerance:	0.001 m/z or 10.0 ppm
			MS level:	2
			Compare spectra similarity:	Weighted cosine similarity
			Weights:	MassBank (mz^2 * I^0.5)
			Minimum cos similarity:	0.85
			Handle unmatched signals:	KEEP ALL AND MATCH TO ZERO
		Original feature list:	KEEP
	Feature list rows filter
		Feature lists	BATCH_LAST_FEATURELISTS
		Name suffix	filtered
		Minimum aligned features (samples)	TRUE
			abs=15
		Minimum features in an isotope pattern	FALSE
		Validate 13C isotope pattern	FALSE
		Remove redundant isotope rows	FALSE
		m/z	FALSE
		Retention time	TRUE
			min=0.24; max=9.59
		features duration range	FALSE
		Chromatographic FWHM	FALSE
		Charge	FALSE
		Kendrick mass defect	FALSE
		Parameter	No parameters defined
		Text in identity	FALSE
		Text in comment	FALSE
		Keep or remove rows	Keep rows that match all criteria
		Feature with MS2 scan	FALSE
		Never remove feature with MS2	FALSE
		Reset the feature number ID	FALSE
		Mass defect	FALSE
		Original feature list	KEEP
	Gap Filling - Peak finder (multithreaded)
		Feature lists	BATCH_LAST_FEATURELISTS
		Name suffix	gap-filled
		Intensity tolerance	0.5
		m/z tolerance	0.000 or 10.0 ppm
		Retention time tolerance	0.03 absolute (min)
		Minimum scans (data points)	1
		Original feature list	KEEP
	Duplicate peak filter
		Filter mode	New average
		m/z tolerance	0.000 or 5.0 ppm
		Retention time tolerance	0.05 absolute (min)
		Mobility tolerance	FALSE
		Require same identification	TRUE

## Sheet: Table S3.1
Data Conversion to *.mzML
Using MSConvert
MSConvertGUI (3.0.25143-fa08d4d)
	Options
		Output format	mzML
		Binary encoding precision	64-bit
		Write index	check
		TPP compatibility	check
	Filters
		Peak Picking
		MS Level	2-2
Mzmine 4.5.20
	Import MS data
	Merge files
		Raw data files:	Evaluation not executed.
		Mode:	Merge pattern
		Grouping identifier position:	After last
		Position marker:	_
		MS2 marker:	false	()
		Suffix to new name:	_merged
	Mass detection
		Raw data files:	All raw data files
		Scan filters:	MS1, level = 1
		Mass Detector	Centroid
			Noise level:	600
	Mass detection
		Raw data files:	All raw data files
		Scan filters:	MS1, level = 2
		Mass Detector	Centroid
			Noise level:	40
	Chromatogram builder
		Raw data files:	All raw data files
		Scan filters:	MS1, level = 1
		Minimum consecutive scans:	3
		Minimum intensity for consecutive scans:	1800
		Minimum absolute height:	4200
		m/z tolerance (scan-to-scan):	0.0 m/z or 25.0 ppm
		Suffix:	chromatograms
	Local minimum feature resolver
		Feature lists:	BATCH_LAST_FEATURELISTS
		Suffix:	resolved_1
		Original feature list:	KEEP
		MS/MS scan pairing:	true
			Retention time filter	Use tolerance	0.05 absolute (min)
			MS1 to MS2 precursor tolerance (m/z):	0.2 m/z or 0.0 ppm
		Dimension:	Retention time
		Chromatographic threshold:	0.9
		Minimum search range RT/Mobility (absolute):	0.05
		Minimum relative height:	0
		Minimum absolute height:	1800
		Min ratio of peak top/edge:	2
		Peak duration range (min/mobility):	[0.0..1.0]
		Minimum scans (data points):	3
	isotope grouper
		Feature lists:	BATCH_LAST_FEATURELISTS
		Name suffix:	deisotoped
		m/z tolerance (intra-sample):	0.0 m/z or 5 ppm
		Retention time tolerance:	0.05 minutes
		Mobility tolerance:	false
		Monotonic shape:	True
		Maximum charge:	1
		Representative isotope:	Most intense
		Never remove feature with MS2:	true
		Original feature list:	KEEP
	Join aligner
		Feature lists:	BATCH_LAST_FEATURELISTS
		Feature list name:	Aligned feature list_1
		m/z tolerance (sample-to-sample):	0.0 m/z or 15.0 ppm
		Weight for m/z:	3
		Retention time tolerance:	0.05 minutes
		Weight for RT:	1
		Mobility tolerance:	false	(null)
		Mobility weight:	0
		Require same charge state:	false
		Require same ID:	false
		Compare isotope pattern:	false
		Compare spectra similarity:	True
			Spectral m/z tolerance:	0.001 m/z or 10.0 ppm
			MS level:	2
			Compare spectra similarity:	Weighted cosine similarity
			Weights:	MassBank (mz^2 * I^0.5)
			Minimum cos similarity:	0.85
			Handle unmatched signals:	KEEP ALL AND MATCH TO ZERO
		Original feature list:	KEEP
	Feature list blank substraction	Minimun # of detections blanks	1
		Quantification	Height
		Ratio Type	MAXIMUM
		Fold Change increase	500
		keep or remove	REMOVE- Only Keep features above fold chance
		Suffix	Sustracted
	Feature filter
		Feature lists	BATCH_LAST_FEATURELISTS
		Name suffix	OnlyMS2
		Duration	false
		Area	false
		Height	false
		# data points	false
		FWHM	false
		Tailing factor	false
		Asymmetry factor	false
		Keep only features with MS/MS scan	true
		Original feature list	KEEP

## Sheet: Table S3.2
Data Conversion to *.mzML
Using MSConvert
MSConvertGUI (3.0.25143-fa08d4d)
	Options
		Output format	mzML
		Binary encoding precision	64-bit
		Write index	check
		TPP compatibility	check
	Filters
		Peak Picking
		MS Level	2-2
Mzmine 4.5.20
	Import MS data
	Merge files
		Raw data files:	Evaluation not executed.
		Mode:	Merge pattern
		Grouping identifier position:	After last
		Position marker:	_
		MS2 marker:	false	()
		Suffix to new name:	_merged
	Mass detection
		Raw data files:	All raw data files
		Scan filters:	MS1, level = 1
		Mass Detector	Centroid
			Noise level:	600
	Mass detection
		Raw data files:	All raw data files
		Scan filters:	MS1, level = 2
		Mass Detector	Centroid
			Noise level:	40
	Chromatogram builder
		Raw data files:	All raw data files
		Scan filters:	MS1, level = 1
		Minimum consecutive scans:	3
		Minimum intensity for consecutive scans:	1800
		Minimum absolute height:	4200
		m/z tolerance (scan-to-scan):	0.0 m/z or 25.0 ppm
		Suffix:	chromatograms
	Local minimum feature resolver
		Feature lists:	BATCH_LAST_FEATURELISTS
		Suffix:	resolved_1
		Original feature list:	KEEP
		MS/MS scan pairing:	true
			Retention time filter	Use tolerance	0.05 absolute (min)
			MS1 to MS2 precursor tolerance (m/z):	0.2 m/z or 0.0 ppm
		Dimension:	Retention time
		Chromatographic threshold:	0.9
		Minimum search range RT/Mobility (absolute):	0.05
		Minimum relative height:	0
		Minimum absolute height:	1800
		Min ratio of peak top/edge:	2
		Peak duration range (min/mobility):	[0.0..1.0]
		Minimum scans (data points):	3
	isotope grouper
		Feature lists:	BATCH_LAST_FEATURELISTS
		Name suffix:	deisotoped
		m/z tolerance (intra-sample):	0.0 m/z or 5 ppm
		Retention time tolerance:	0.05 minutes
		Mobility tolerance:	false
		Monotonic shape:	True
		Maximum charge:	1
		Representative isotope:	Most intense
		Never remove feature with MS2:	true
		Original feature list:	KEEP
	Join aligner
		Feature lists:	BATCH_LAST_FEATURELISTS
		Feature list name:	Aligned feature list_1
		m/z tolerance (sample-to-sample):	0.0 m/z or 15.0 ppm
		Weight for m/z:	3
		Retention time tolerance:	0.05 minutes
		Weight for RT:	1
		Mobility tolerance:	false	(null)
		Mobility weight:	0
		Require same charge state:	false
		Require same ID:	false
		Compare isotope pattern:	false
		Compare spectra similarity:	True
			Spectral m/z tolerance:	0.001 m/z or 10.0 ppm
			MS level:	2
			Compare spectra similarity:	Weighted cosine similarity
			Weights:	MassBank (mz^2 * I^0.5)
			Minimum cos similarity:	0.85
			Handle unmatched signals:	KEEP ALL AND MATCH TO ZERO
		Original feature list:	KEEP
	Feature list blank substraction	Minimun # of detections blanks	1
		Quantification	Height
		Ratio Type	MAXIMUM
		Fold Change increase	500
		keep or remove	REMOVE- Only Keep features above fold chance
		Suffix	Sustracted
	Feature filter
		Feature lists	BATCH_LAST_FEATURELISTS
		Name suffix	OnlyMS2
		Duration	false
		Area	false
		Height	false
		# data points	false
		FWHM	false
		Tailing factor	false
		Asymmetry factor	false
		Keep only features with MS/MS scan	true
		Original feature list	KEEP

## Sheet: Table S4.1
Data Conversion to *.mzML
Using MSConvert
MSConvertGUI (3.0.25143-fa08d4d)
	Options
		Output format	mzML
		Binary encoding precision	64-bit
		Write index	check
		TPP compatibility	check
	Filters
		Peak Picking
		MS Level	2-2
Mzmine 4.5.20
	Import MS data
	Merge files
		Raw data files:	Evaluation not executed.
		Mode:	Merge pattern
		Grouping identifier position:	After last
		Position marker:	_
		MS2 marker:	false	()
		Suffix to new name:	_merged
	Mass detection
		Raw data files:	All raw data files
		Scan filters:	MS1, level = 1
		Mass Detector	Centroid
			Noise level:	600
	Mass detection
		Raw data files:	All raw data files
		Scan filters:	MS1, level = 2
		Mass Detector	Centroid
			Noise level:	40
	Chromatogram builder
		Raw data files:	All raw data files
		Scan filters:	MS1, level = 1
		Minimum consecutive scans:	3
		Minimum intensity for consecutive scans:	1800
		Minimum absolute height:	4200
		m/z tolerance (scan-to-scan):	0.0 m/z or 25.0 ppm
		Suffix:	chromatograms
	Local minimum feature resolver
		Feature lists:	BATCH_LAST_FEATURELISTS
		Suffix:	resolved_1
		Original feature list:	KEEP
		MS/MS scan pairing:	true
			Retention time filter	Use tolerance	0.05 absolute (min)
			MS1 to MS2 precursor tolerance (m/z):	0.2 m/z or 0.0 ppm
		Dimension:	Retention time
		Chromatographic threshold:	0.9
		Minimum search range RT/Mobility (absolute):	0.05
		Minimum relative height:	0
		Minimum absolute height:	1800
		Min ratio of peak top/edge:	2
		Peak duration range (min/mobility):	[0.0..1.0]
		Minimum scans (data points):	3
	isotope grouper
		Feature lists:	BATCH_LAST_FEATURELISTS
		Name suffix:	deisotoped
		m/z tolerance (intra-sample):	0.0 m/z or 5 ppm
		Retention time tolerance:	0.05 minutes
		Mobility tolerance:	false
		Monotonic shape:	True
		Maximum charge:	1
		Representative isotope:	Most intense
		Never remove feature with MS2:	true
		Original feature list:	KEEP
	Join aligner
		Feature lists:	BATCH_LAST_FEATURELISTS
		Feature list name:	Aligned feature list_1
		m/z tolerance (sample-to-sample):	0.0 m/z or 15.0 ppm
		Weight for m/z:	3
		Retention time tolerance:	0.05 minutes
		Weight for RT:	1
		Mobility tolerance:	false	(null)
		Mobility weight:	0
		Require same charge state:	false
		Require same ID:	false
		Compare isotope pattern:	false
		Compare spectra similarity:	True
			Spectral m/z tolerance:	0.001 m/z or 10.0 ppm
			MS level:	2
			Compare spectra similarity:	Weighted cosine similarity
			Weights:	MassBank (mz^2 * I^0.5)
			Minimum cos similarity:	0.85
			Handle unmatched signals:	KEEP ALL AND MATCH TO ZERO
		Original feature list:	KEEP
	Feature list blank substraction	Minimun # of detections blanks	1
		Quantification	Height
		Ratio Type	MAXIMUM
		Fold Change increase	500
		keep or remove	REMOVE- Only Keep features above fold chance
		Suffix	Sustracted
	Feature filter
		Feature lists	BATCH_LAST_FEATURELISTS
		Name suffix	OnlyMS2
		Duration	false
		Area	false
		Height	false
		# data points	false
		FWHM	false
		Tailing factor	false
		Asymmetry factor	false
		Keep only features with MS/MS scan	true
		Original feature list	KEEP

## Sheet: Table S4.2
Data Conversion to *.mzML
Using MSConvert
MSConvertGUI (3.0.25143-fa08d4d)
	Options
		Output format	mzML
		Binary encoding precision	64-bit
		Write index	check
		TPP compatibility	check
	Filters
		Peak Picking
		MS Level	2-2
Mzmine 4.5.20
	Import MS data
	Merge files
		Raw data files:	Evaluation not executed.
		Mode:	Merge pattern
		Grouping identifier position:	After last
		Position marker:	_
		MS2 marker:	false	()
		Suffix to new name:	_merged
	Mass detection
		Raw data files:	All raw data files
		Scan filters:	MS1, level = 1
		Mass Detector	Centroid
			Noise level:	600
	Mass detection
		Raw data files:	All raw data files
		Scan filters:	MS1, level = 2
		Mass Detector	Centroid
			Noise level:	40
	Chromatogram builder
		Raw data files:	All raw data files
		Scan filters:	MS1, level = 1
		Minimum consecutive scans:	3
		Minimum intensity for consecutive scans:	1800
		Minimum absolute height:	4200
		m/z tolerance (scan-to-scan):	0.0 m/z or 25.0 ppm
		Suffix:	chromatograms
	Local minimum feature resolver
		Feature lists:	BATCH_LAST_FEATURELISTS
		Suffix:	resolved_1
		Original feature list:	KEEP
		MS/MS scan pairing:	true
			Retention time filter	Use tolerance	0.05 absolute (min)
			MS1 to MS2 precursor tolerance (m/z):	0.2 m/z or 0.0 ppm
		Dimension:	Retention time
		Chromatographic threshold:	0.9
		Minimum search range RT/Mobility (absolute):	0.05
		Minimum relative height:	0
		Minimum absolute height:	1800
		Min ratio of peak top/edge:	2
		Peak duration range (min/mobility):	[0.0..1.0]
		Minimum scans (data points):	3
	isotope grouper
		Feature lists:	BATCH_LAST_FEATURELISTS
		Name suffix:	deisotoped
		m/z tolerance (intra-sample):	0.0 m/z or 5 ppm
		Retention time tolerance:	0.05 minutes
		Mobility tolerance:	false
		Monotonic shape:	True
		Maximum charge:	1
		Representative isotope:	Most intense
		Never remove feature with MS2:	true
		Original feature list:	KEEP
	Join aligner
		Feature lists:	BATCH_LAST_FEATURELISTS
		Feature list name:	Aligned feature list_1
		m/z tolerance (sample-to-sample):	0.0 m/z or 15.0 ppm
		Weight for m/z:	3
		Retention time tolerance:	0.05 minutes
		Weight for RT:	1
		Mobility tolerance:	false	(null)
		Mobility weight:	0
		Require same charge state:	false
		Require same ID:	false
		Compare isotope pattern:	false
		Compare spectra similarity:	True
			Spectral m/z tolerance:	0.001 m/z or 10.0 ppm
			MS level:	2
			Compare spectra similarity:	Weighted cosine similarity
			Weights:	MassBank (mz^2 * I^0.5)
			Minimum cos similarity:	0.85
			Handle unmatched signals:	KEEP ALL AND MATCH TO ZERO
		Original feature list:	KEEP
	Feature list blank substraction	Minimun # of detections blanks	1
		Quantification	Height
		Ratio Type	MAXIMUM
		Fold Change increase	500
		keep or remove	REMOVE- Only Keep features above fold chance
		Suffix	Sustracted
	Feature filter
		Feature lists	BATCH_LAST_FEATURELISTS
		Name suffix	OnlyMS2
		Duration	false
		Area	false
		Height	false
		# data points	false
		FWHM	false
		Tailing factor	false
		Asymmetry factor	false
		Keep only features with MS/MS scan	true
		Original feature list	KEEP

## Sheet: Table_S5 Identification by mea
GNPS workflow	Name project	GNPS ID	Input file
Feature-Based Molecular Networking (FBMN)	MZmine data of 10 eV pos	ecee3bbec41f47549b068b8f63f6b532	mzMine DDA +
Feature-Based Molecular Networking (FBMN)	MZmine data of 20 eV pos	19ce51c9db5b418fabcff803435207de	mzMine DDA +
Feature-Based Molecular Networking (FBMN)	MZmine data of 10 eV neg	85c507864b9b464a9f607e05bce854e9	mzMine DDA -
Feature-Based Molecular Networking (FBMN)	MZmine data of 20 eV neg	4d5f30d446484533ad01c816a5c1ffd2	mzMine DDA -
